# Supplementary material for: Synthesis of surface-modified monoclinic ZrO2 nanoparticles using supercritical water
Source: Royal Society of Chemistry journal article supplement (doi:10.1039/c2ce06409j), 2012-01-01
Supplement: c2ce06409j.pdf [file c2ce06409j.pdf]

**Electronic Supplementary Information Available for “Synthesis of Surface-Modified Monoclinic ZrO<sub>2</sub> Nanoparticles using Supercritical Water”**

Minori Taguchi<sup>†\*</sup>, Seiichi Takami<sup>‡</sup>, Tadafumi Adschiri<sup>§</sup>, Takayuki Nakane<sup>†</sup>, Koichi Sato<sup>†</sup>  
and Takashi Naka<sup>†</sup>

<sup>†</sup>National Institute for Materials Science,

1-2-1 Sengen, Tsukuba 305-0047, Japan

<sup>‡</sup>Institute of Multidisciplinary Research for Advanced Materials, Tohoku University,

2-1-1 Katahira, Aoba-ku, Sendai 980-8577, Japan

<sup>§</sup>WPI, Advanced Institute for Materials Research, Tohoku University,

2-1-1 Katahira, Aoba-ku, Sendai 980-8577, Japan

## Supplementary Figure

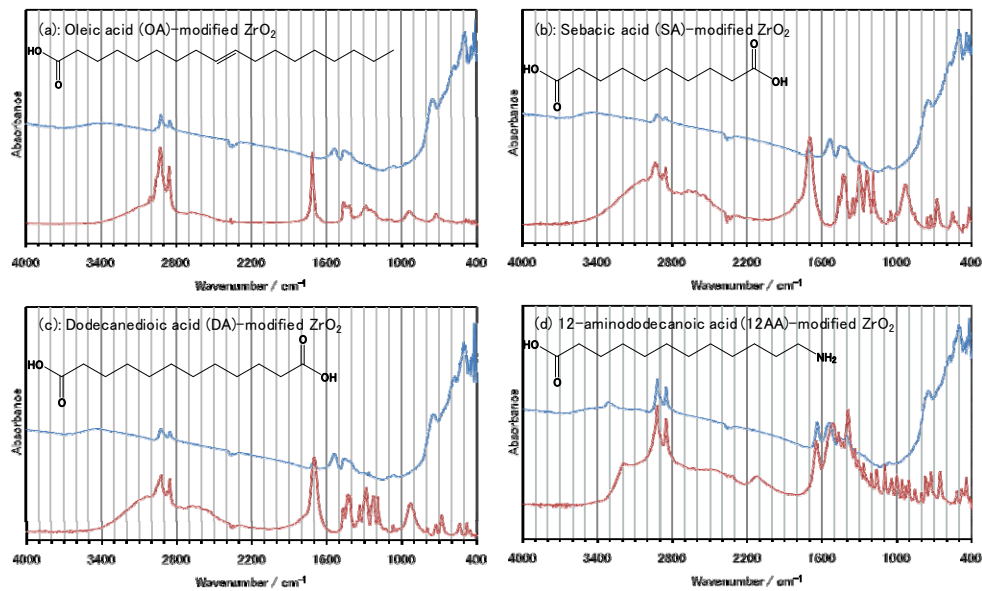

Figure S1. FT-IR spectra of surface-modified  $\text{ZrO}_2$  nanoparticles (top: blue line) and original modifiers (bottom: red line): (a) oleic acid (OA)-modified, (b) sebacic acid (SA)-modified, (c) dodecanedioic acid (DA)-modified and (d) 12-aminododecanoic acid-modified.
